# Supplementary material for: Physical Activity and Cognitive Function in Mild Cognitive Impairment
Source: PubMed Central journal article supplement — ASN Neuro. 2020 Jan 16;12:1759091419901182. doi: 10.1177/1759091419901182 (PMC6970452; doi:10.1177/1759091419901182), 2020-01-16
Supplement: ASN901182_Supplemental_material.pdf [file ASN901182_Supplemental_material.pdf]

**Title**

Physical activity and cognitive function in mild cognitive impairment

**Journal name**

ASN NEURO

**Author**

Ya-Ting Chang M.D., Ph.D.

**Corresponding author:**

Dr. Ya-Ting Chang

Department of Neurology, Kaohsiung Chang Gung Memorial Hospital

123, Ta-Pei Road, Niasung, Kaohsiung 83301, Taiwan

E-mail: [emily0606@adm.cgmh.org.tw](mailto:emily0606@adm.cgmh.org.tw)

Tel: +886-7-731-7123 ext. 3389

Fax: +886-7-735-1334

**Table S1. Correlation of cognitive function with age and education**

| <b>Cognitive function</b>                | <b>Age (years)</b> | <b>Education (years)</b> |
|------------------------------------------|--------------------|--------------------------|
| <b>Memory task</b>                       |                    |                          |
| CASI-Short-term memory                   | -0.125             | 0.194                    |
| CVVLT-30 sec<br>(immediate free recalls) | -0.166             | 0.166                    |
| CVVLT-10 min<br>(delayed free recalls)   | -0.109             | -0.013                   |
| CVVLT-cued<br>(memory in cued response)  | -0.176             | 0.131                    |
| <b>Abstract reasoning</b>                |                    |                          |
| CASI-Abstraction                         | -0.230             | 0.501*                   |
| FAB-Similarity<br>(conceptualization)    | -0.206             | 0.587*                   |
| <b>Attention</b>                         |                    |                          |
| CASI-Concentration                       | -0.302*            | 0.526*                   |
| CASI-Attention                           | -0.138             | 0.217                    |
| Digital Forward Span                     | -0.236             | 0.537*                   |
| <b>Executive task scores</b>             |                    |                          |
| TMB (corrected)                          | -0.101             | 0.269                    |
| Stroop interference test                 | -0.221             | 0.179                    |
| Calculation                              | -0.223             | 0.462*                   |
| <b>Visuospatial task scores</b>          |                    |                          |
| VOSP                                     | -0.121             | 0.029                    |
| Modified ROCF copy                       | -0.112             | 0.349*                   |
| CASI-Visual construction                 | -0.094             | 0.272*                   |
| <b>Language ability</b>                  |                    |                          |
| Boston naming test                       | -0.096             | 0.661*                   |
| CASI-Language ability                    | -0.279*            | 0.543*                   |
| <b>Semantic category fluency</b>         |                    |                          |
| CASI-List-generating                     | -0.265             | 0.373*                   |
| Animal naming                            | -0.343*            | 0.455*                   |
| Fruit naming                             | -0.273*            | 0.190                    |
| Transportation naming                    | -0.106             | 0.299*                   |
| Town naming                              | -0.301             | 0.429*                   |

Data present as  $\rho$  coefficient. \*  $p < 0.05$ ; CASI, Cognitive Abilities Screening Instrument; CVVLT, Chinese version of the Verbal Learning Test (CVVLT-30 sec: free recall after 30 seconds; CVVLT-10 min: free recall after 10 minutes);

FAB-Similarities, similarities (conceptualization) in frontal assessment battery; ROCF, Rey-Osterrieth complex figure; TMB, Trail Making Test B; VOSP, visual object and space perception.

**Table S2. Correlation between each measure of activity and each cognitive score**

|                                 | Direct Correlation<br>between Each<br>Cognitive Score and<br>Each Measure of<br>Activity |                  |                  | Correlation Analysis<br>after Controlling for<br>Age and Sex |                  |                  | Correlation Analysis<br>after Controlling for<br>Age, Sex, and<br>Education |                  |                  |
|---------------------------------|------------------------------------------------------------------------------------------|------------------|------------------|--------------------------------------------------------------|------------------|------------------|-----------------------------------------------------------------------------|------------------|------------------|
|                                 | A                                                                                        | B                | C                | A                                                            | B                | C                | A                                                                           | B                | C                |
| <b>Memory tasks</b>             |                                                                                          |                  |                  |                                                              |                  |                  |                                                                             |                  |                  |
| CASI-Short-term<br>memory       | 0.289,<br>0.034                                                                          | 0.260,<br>0.058  | 0.231,<br>0.093  | 0.087,<br>0.559                                              | 0.065,<br>0.664  | 0.061,<br>0.685  | 0.093,<br>0.540                                                             | 0.070,<br>0.644  | 0.066,<br>0.665  |
| CVVLT-30 sec                    | 0.183,<br>0.186                                                                          | 0.155,<br>0.264  | 0.130,<br>0.351  | 0.186,<br>0.210                                              | 0.119,<br>0.425  | 0.143,<br>0.338  | 0.166,<br>0.271                                                             | 0.097,<br>0.523  | 0.122,<br>0.421  |
| CVVLT-10 min                    | 0.236,<br>0.085                                                                          | 0.191,<br>0.167  | 0.194,<br>0.159  | 0.253,<br>0.086                                              | 0.182,<br>0.220  | 0.216,<br>0.145  | 0.268,<br>0.072                                                             | 0.196,<br>0.192  | 0.230,<br>0.124  |
| CVVLT-cued                      | 0.163,<br>0.238                                                                          | 0.123,<br>0.375  | 0.121,<br>0.382  | 0.166,<br>0.264                                              | 0.105,<br>0.484  | 0.122,<br>0.412  | 0.161,<br>0.284                                                             | 0.099,<br>0.515  | 0.117,<br>0.439  |
| <b>Abstract reasoning</b>       |                                                                                          |                  |                  |                                                              |                  |                  |                                                                             |                  |                  |
| CASI-<br>Abstraction            | 0.252,<br>0.066                                                                          | 0.225,<br>0.101  | 0.292,<br>0.032  | 0.212,<br>0.153                                              | 0.118,<br>0.428  | 0.204,<br>0.168  | 0.162,<br>0.283                                                             | 0.060,<br>0.694  | 0.155,<br>0.304  |
| FAB-Similarity                  | 0.182,<br>0.188                                                                          | 0.181,<br>0.190  | 0.220,<br>0.110  | 0.137,<br>0.358                                              | 0.082,<br>0.583  | 0.103,<br>0.491  | 0.059,<br>0.698                                                             | -0.006,<br>0.968 | 0.021,<br>0.890  |
| <b>Attention</b>                |                                                                                          |                  |                  |                                                              |                  |                  |                                                                             |                  |                  |
| CASI-<br>Concentration          | 0.161,<br>0.246                                                                          | 0.132,<br>0.342  | 0.236,<br>0.085  | 0.145,<br>0.330                                              | 0.070,<br>0.641  | 0.142,<br>0.342  | 0.100,<br>0.510                                                             | 0.019,<br>0.899  | 0.097,<br>0.521  |
| CASI-Attention                  | 0.238,<br>0.083                                                                          | 0.293,<br>0.032  | 0.296,<br>0.030  | 0.286,<br>0.051                                              | 0.322,<br>0.027  | 0.254,<br>0.085  | 0.264,<br>0.076                                                             | 0.301,<br>0.042  | 0.232,<br>0.121  |
| Digital Forward<br>Span         | -0.023,<br>0.870                                                                         | -0.031,<br>0.824 | 0.069,<br>0.622  | -0.079,<br>0.599                                             | -0.133,<br>0.373 | -0.040,<br>0.789 | -0.153,<br>0.310                                                            | -0.213,<br>0.156 | -0.110,<br>0.467 |
| <b>Executive task scores</b>    |                                                                                          |                  |                  |                                                              |                  |                  |                                                                             |                  |                  |
| TMB (corrected)                 | 0.327,<br>0.021                                                                          | 0.330,<br>0.019  | 0.379,<br>0.007  | 0.216,<br>0.145                                              | 0.224,<br>0.130  | 0.307,<br>0.036  | 0.197,<br>0.189                                                             | 0.205,<br>0.172  | 0.291,<br>0.050  |
| Stroop<br>interference test     | 0.230,<br>0.109                                                                          | 0.199,<br>0.166  | 0.177,<br>0.220  | 0.181,<br>0.224                                              | 0.089,<br>0.554  | 0.067,<br>0.655  | 0.162,<br>0.281                                                             | 0.068,<br>0.654  | 0.046,<br>0.760  |
| Calculation                     | 0.045,<br>0.744                                                                          | 0.028,<br>0.842  | 0.109,<br>0.433  | 0.144,<br>0.334                                              | 0.075,<br>0.616  | 0.104,<br>0.485  | 0.104,<br>0.494                                                             | 0.031,<br>0.840  | 0.063,<br>0.679  |
| <b>Visuospatial task scores</b> |                                                                                          |                  |                  |                                                              |                  |                  |                                                                             |                  |                  |
| VOSP                            | -0.102,<br>0.465                                                                         | -0.092,<br>0.507 | -0.130,<br>0.349 | -0.069,<br>0.644                                             | -0.076,<br>0.612 | -0.199,<br>0.179 | -0.045,<br>0.764                                                            | -0.052,<br>0.731 | -0.179,<br>0.233 |

|                                  |                                            |                                              |                                            |
|----------------------------------|--------------------------------------------|----------------------------------------------|--------------------------------------------|
| Modified ROCF copy               | 0.139, 0.170, 0.194,<br>0.318 0.219 0.159  | 0.261, 0.239, 0.276,<br>0.077 0.106 0.061    | 0.256, 0.234, 0.272,<br>0.085 0.117 0.068  |
| CASI-Visual construction         | 0.253, 0.259, 0.225,<br>0.065 0.059 0.102  | 0.253, 0.344, 0.368,<br>0.015 0.018 0.011    | 0.335, 0.325, 0.350,<br>0.023 0.027 0.017  |
| <b>Language ability</b>          |                                            |                                              |                                            |
| Boston naming test               | 0.113, 0.092, 0.127,<br>0.414 0.508 0.359  | -0.001, 0.002, -0.011,<br>0.992 0.987, 0.941 | -0.093,-0.090,-0.103,<br>0.537 0.552 0.497 |
| CASI-Language ability            | 0.079, 0.061, 0.129,<br>0.569 0.659 0.351  | 0.075, 0.047, 0.048,<br>0.616 0.753 0.746    | 0.023, -0.008,-0.005,<br>0.881 0.959 0.975 |
| <b>Semantic category fluency</b> |                                            |                                              |                                            |
| CASI-List-generating             | 0.212, 0.219, 0.239,<br>0.124 0.112 0.081  | 0.169, 0.086, 0.193,<br>0.255 0.564 0.195    | 0.128, 0.040, 0.153,<br>0.395 0.792 0.309  |
| Animal naming                    | 0.429, 0.395, 0.475,<br>0.001 0.003 <0.001 | 0.352, 0.301, 0.375,<br>0.015 0.040 0.009    | 0.326, 0.273, 0.350,<br>0.027 0.067 0.017  |
| Fruit naming                     | 0.329, 0.298, 0.311,<br>0.015 0.029 0.022  | 0.318, 0.281, 0.306,<br>0.029 0.056 0.036    | 0.273, 0.254, 0.282,<br>0.067 0.088 0.058  |
| Transportation naming            | 0.332, 0.323, 0.357,<br>0.014 0.017 0.008  | 0.262, 0.287, 0.281,<br>0.075 0.050 0.056    | 0.257, 0.284, 0.285,<br>0.085 0.056 0.055  |
| Town naming                      | 0.302, 0.252, 0.311,<br>0.026 0.066 0.022  | 0.330, 0.287, 0.244,<br>0.023 0.050 0.099    | 0.300, 0.255, 0.210,<br>0.043 0.088 0.161  |

Data present as ( $\rho$ ,  $p$ ). A: average step counts per day of 7-day activity; B: average distance (kilometers) per day of 7-day activity; C: average calorie expenditure per day of 7-day activity; CASI, Cognitive Abilities Screening Instrument; CVVLT, Chinese version of the Verbal Learning Test (CVVLT-30 sec: free recall after 30 seconds; CVVLT-10 min: free recall after 10 minutes); FAB-Similarities, similarities (conceptualization) in frontal assessment battery; ROCF, Rey-Osterrieth complex figure; TMB, Trail Making Test B; VOSP, visual object and space perception.

**Table S3. Multiple regression between average step counts per day of 7-day activity and cognitive function**

| <b>Cognitive function</b>                | <b>Model 1 <sup>a</sup></b><br><b>(R<sup>2</sup> = 0.167)</b> | <b>Model 2 <sup>b</sup></b><br><b>(R<sup>2</sup> = 0.199)</b> |
|------------------------------------------|---------------------------------------------------------------|---------------------------------------------------------------|
| <b>Memory tasks</b>                      |                                                               |                                                               |
| CASI-Short-term memory                   | 0.052                                                         | 0.085                                                         |
| CVVLT-30 sec<br>(immediate free recalls) | 0.18                                                          | 0.196                                                         |
| CVVLT-10 min<br>(delayed free recalls)   | 0.224                                                         | 0.272                                                         |
| CVVLT-cued<br>(memory in cued response)  | 0.157                                                         | 0.200                                                         |
| <b>Abstract reasoning</b>                |                                                               |                                                               |
| CASI-Abstraction                         | 0.099                                                         | 0.162                                                         |
| FAB-Similarity<br>(conceptualization)    | 0.036                                                         | 0.008                                                         |
| <b>Attention</b>                         |                                                               |                                                               |
| CASI-Concentration                       | -0.005                                                        | -0.051                                                        |
| CASI-Attention                           | 0.198                                                         | 0.200                                                         |
| Digital Forward Span                     | -0.206                                                        | -0.207                                                        |
| <b>Executive task scores</b>             |                                                               |                                                               |
| TMB (corrected)                          | 0.180                                                         | 0.066                                                         |
| Stroop interference test                 | 0.158                                                         | 0.129                                                         |
| Calculation                              | -0.030                                                        | -0.034                                                        |
| <b>Visuospatial task scores</b>          |                                                               |                                                               |
| VOSP                                     | -0.076                                                        | -0.040                                                        |
| Modified ROCF copy                       | 0.127                                                         | 0.030                                                         |
| CASI-Visual construction                 | 0.355*                                                        | 0.192                                                         |
| <b>Language ability</b>                  |                                                               |                                                               |
| Boston naming test                       | -0.047                                                        | -0.127                                                        |
| CASI-Language ability                    | -0.040                                                        | 0.024                                                         |
| <b>Semantic category fluency</b>         |                                                               |                                                               |
| CASI-List-generating                     | 0.132                                                         | 0.070                                                         |
| Animal naming                            | 0.262                                                         | 0.256                                                         |
| Fruit naming                             | 0.214                                                         | 0.191                                                         |
| Transportation naming                    | 0.108                                                         | 0.186                                                         |
| Town naming                              | 0.211                                                         | 0.230                                                         |

<sup>a</sup> Multiple regression controlled for age and gender. Data present as  $\beta$  coefficient.

<sup>b</sup> Multiple regression controlled for age, gender, and education. Data present as  $\beta$  coefficient.

\*  $p < 0.05$ ; CASI, Cognitive Abilities Screening Instrument; CVVLT, Chinese version of the Verbal Learning Test (CVVLT-30 sec: free recall after 30 seconds; CVVLT-10 min: free recall after 10 minutes); FAB-Similarities, similarities (conceptualization) in frontal assessment battery; ROCF, Rey-Osterrieth complex figure; TMB, Trail Making Test B; VOSP, visual object and space perception.

**Table S4. Multiple regression between average distance (kilometers) per day of 7-day activity and cognitive function**

| <b>Cognitive function</b>                | <b>Model 1 <sup>a</sup></b><br><b>(R<sup>2</sup> = 0.157)</b> | <b>Model 2 <sup>b</sup></b><br><b>(R<sup>2</sup> = 0.177)</b> |
|------------------------------------------|---------------------------------------------------------------|---------------------------------------------------------------|
| <b>Memory tasks</b>                      |                                                               |                                                               |
| CASI-Short-term memory                   | 0.029                                                         | 0.061                                                         |
| CVVLT-30 sec<br>(immediate free recalls) | 0.086                                                         | 0.119                                                         |
| CVVLT-10 min<br>(delayed free recalls)   | 0.149                                                         | 0.194                                                         |
| CVVLT-cued<br>(memory in cued response)  | 0.091                                                         | 0.129                                                         |
| <b>Abstract reasoning</b>                |                                                               |                                                               |
| CASI-Abstraction                         | -0.004                                                        | 0.053                                                         |
| FAB-Similarity<br>(conceptualization)    | -0.022                                                        | -0.057                                                        |
| <b>Attention</b>                         |                                                               |                                                               |
| CASI-Concentration                       | -0.089                                                        | -0.130                                                        |
| CASI-Attention                           | 0.241                                                         | 0.245                                                         |
| Digital Forward Span                     | -0.262                                                        | -0.265                                                        |
| <b>Executive task scores</b>             |                                                               |                                                               |
| TMB (corrected)                          | 0.189                                                         | 0.087                                                         |
| Stroop interference test                 | 0.060                                                         | 0.030                                                         |
| Calculation                              | -0.108                                                        | -0.105                                                        |
| <b>Visuospatial task scores</b>          |                                                               |                                                               |
| VOSP                                     | -0.082                                                        | -0.048                                                        |
| Modified ROCF copy                       | 0.105                                                         | 0.025                                                         |
| CASI-Visual construction                 | 0.346*                                                        | 0.195                                                         |
| <b>Language ability</b>                  |                                                               |                                                               |
| Boston naming test                       | -0.042                                                        | -0.120                                                        |
| CASI-Language ability                    | -0.068                                                        | -0.008                                                        |
| <b>Semantic category fluency</b>         |                                                               |                                                               |
| CASI-List-generating                     | 0.043                                                         | -0.021                                                        |
| Animal naming                            | 0.206                                                         | 0.202                                                         |
| Fruit naming                             | 0.175                                                         | 0.157                                                         |
| Transportation naming                    | 0.146                                                         | 0.221                                                         |
| Town naming                              | 0.165                                                         | 0.186                                                         |

<sup>a</sup> Multiple regression controlled for age and gender. Data present as  $\beta$  coefficient.



<sup>b</sup> Multiple regression controlled for age, gender, and education. Data present as  $\beta$  coefficient.

\*  $p < 0.05$ ; CASI, Cognitive Abilities Screening Instrument; CVVLT, Chinese version of the Verbal Learning Test (CVVLT-30 sec: free recall after 30 seconds; CVVLT-10 min: free recall after 10 minutes); FAB-Similarities, similarities (conceptualization) in frontal assessment battery; ROCF, Rey-Osterrieth complex figure; TMB, Trail Making Test B; VOSP, visual object and space perception.

**Table S5. Multiple regression between average calorie expenditure per day of 7-day activity and cognitive function**

| <b>Cognitive function</b>                | <b>Model 1 <sup>a</sup></b><br><b>(R<sup>2</sup> = 0.224)</b> | <b>Model 2 <sup>b</sup></b><br><b>(R<sup>2</sup> = 0.232)</b> |
|------------------------------------------|---------------------------------------------------------------|---------------------------------------------------------------|
| <b>Memory tasks</b>                      |                                                               |                                                               |
| CASI-Short-term memory                   | -0.098                                                        | 0.027                                                         |
| CVVLT-30 sec<br>(immediate free recalls) | -0.065                                                        | 0.095                                                         |
| CVVLT-10 min<br>(delayed free recalls)   | 0.092                                                         | 0.196                                                         |
| CVVLT-cued<br>(memory in cued response)  | -0.027                                                        | 0.106                                                         |
| <b>Abstract reasoning</b>                |                                                               |                                                               |
| CASI-Abstraction                         | 0.054                                                         | 0.046                                                         |
| FAB-Similarity<br>(conceptualization)    | -0.010                                                        | -0.077                                                        |
| <b>Attention</b>                         |                                                               |                                                               |
| CASI-Concentration                       | 0.021                                                         | -0.051                                                        |
| CASI-Attention                           | 0.211                                                         | 0.145                                                         |
| Digital Forward Span                     | -0.061                                                        | -0.224                                                        |
| <b>Executive task scores</b>             |                                                               |                                                               |
| TMB (corrected)                          | 0.213                                                         | 0.267                                                         |
| Stroop interference test                 | -0.058                                                        | 0.021                                                         |
| Calculation                              | 0.039                                                         | -0.117                                                        |
| <b>Visuospatial task scores</b>          |                                                               |                                                               |
| VOSP                                     | -0.192                                                        | -0.202                                                        |
| Modified ROCF copy                       | 0.259                                                         | 0.142                                                         |
| CASI-Visual construction                 | 0.274                                                         | 0.342*                                                        |
| <b>Language ability</b>                  |                                                               |                                                               |
| Boston naming test                       | -0.121                                                        | -0.131                                                        |
| CASI-Language ability                    | -0.048                                                        | -0.116                                                        |
| <b>Semantic category fluency</b>         |                                                               |                                                               |
| CASI-List-generating                     | 0.017                                                         | 0.128                                                         |
| Animal naming                            | 0.392*                                                        | 0.267                                                         |
| Fruit naming                             | 0.093                                                         | 0.179                                                         |
| Transportation naming                    | 0.157                                                         | 0.138                                                         |
| Town naming                              | 0.084                                                         | 0.078                                                         |

<sup>a</sup> Multiple regression controlled for age and gender. Data present as  $\beta$  coefficient.

<sup>b</sup> Multiple regression controlled for age, gender, and education. Data present as  $\beta$  coefficient.

\*  $p < 0.05$ ; CASI, Cognitive Abilities Screening Instrument; CVVLT, Chinese version of the Verbal Learning Test (CVVLT-30 sec: free recall after 30 seconds; CVVLT-10 min: free recall after 10 minutes); FAB-Similarities, similarities (conceptualization) in frontal assessment battery; ROCF, Rey-Osterrieth complex figure; TMB, Trail Making Test B; VOSP, visual object and space perception.
